# Supplementary material
Source: MDPI journal article supplement (https://www.mdpi.com/2071-1050/15/11/8551)
Supplement: s1 [file s1 › sustainability-2281216-supplementary.pdf]

## Supplementary Information

**Table S1.** Localized SDG indicators (SDGs 1-4, 6-11) for Hainan and rationale for optimal indicator values.

| SDGs                                       | Targets                                                                                                                                                                                                                                                            | Localized Targets                                                           | Localized Indicators               | Sources            | Justification for Optimum              | Effect Direction |
|--------------------------------------------|--------------------------------------------------------------------------------------------------------------------------------------------------------------------------------------------------------------------------------------------------------------------|-----------------------------------------------------------------------------|------------------------------------|--------------------|----------------------------------------|------------------|
| 1. End poverty in all its forms everywhere | 1.1 By 2030, eradicate extreme poverty for all people everywhere, currently measured as people living on less than \$1.25 a day                                                                                                                                    | 1.1 Per capita disposable income                                            | Urban per capita disposable income | Statistics data[1] | Average of 3 best performers in Hainan | +                |
|                                            |                                                                                                                                                                                                                                                                    | disposable income                                                           | Rural per capita disposable income |                    | Average of 3 best performers in Hainan | +                |
|                                            | 1.a Ensure significant mobilization of resources from a variety of sources, including through enhanced development cooperation, in order to provide adequate and predictable means for developing countries, in particular least developed countries, to implement | 1.a Expenditure on health, social security and education by city and county | Health and hygiene Expenditure     | Statistics data[1] | Average of 3 best performers in Hainan | +                |
|                                            |                                                                                                                                                                                                                                                                    |                                                                             | Social Safety net expenditure      |                    | Average of 3 best performers in Hainan | +                |
|                                            |                                                                                                                                                                                                                                                                    |                                                                             | Education expenditure              | Statistics data[1] | Average of 3 best performers in Hainan | +                |
|                                            |                                                                                                                                                                                                                                                                    |                                                                             |                                    |                    |                                        |                  |
|                                            |                                                                                                                                                                                                                                                                    |                                                                             |                                    |                    |                                        |                  |
|                                            |                                                                                                                                                                                                                                                                    |                                                                             |                                    |                    |                                        |                  |
|                                            |                                                                                                                                                                                                                                                                    |                                                                             |                                    |                    |                                        |                  |
|                                            |                                                                                                                                                                                                                                                                    |                                                                             |                                    |                    |                                        |                  |

|                                                                                                 |                                                                                                                                                                                                                                                                                                                                                       |                                        |                                                      |                                                                          |                                        |   |
|-------------------------------------------------------------------------------------------------|-------------------------------------------------------------------------------------------------------------------------------------------------------------------------------------------------------------------------------------------------------------------------------------------------------------------------------------------------------|----------------------------------------|------------------------------------------------------|--------------------------------------------------------------------------|----------------------------------------|---|
| programmes and policies to end                                                                  |                                                                                                                                                                                                                                                                                                                                                       |                                        |                                                      |                                                                          |                                        |   |
| poverty in all its dimensions                                                                   |                                                                                                                                                                                                                                                                                                                                                       |                                        |                                                      |                                                                          |                                        |   |
| 2. End hunger, achieve food security and improved nutrition and promote sustainable agriculture | 2.1 End hunger, achieve food security and improved nutrition and promote sustainable agriculture                                                                                                                                                                                                                                                      | 2.1 Food security guarantee            | Total grain production<br>Food production per capita | $x_1 = \frac{\text{Total grain production}}{\text{Total population}}[1]$ | Average of 3 best performers in Hainan | + |
|                                                                                                 |                                                                                                                                                                                                                                                                                                                                                       |                                        |                                                      |                                                                          | Average of 3 best performers in Hainan | + |
|                                                                                                 | 2.3 By 2030, double the agricultural productivity and incomes of small-scale food producers, in particular women, indigenous peoples, family farmers, pastoralists and fishers, including through secure and equal access to land, other productive resources and inputs, knowledge, financial services, markets and opportunities for value addition | 2.3 Rural per capita disposable income | Per capita disposable income of rural residents      | Statistics data[1]                                                       | Average of 3 best performers in Hainan | + |
|                                                                                                 |                                                                                                                                                                                                                                                                                                                                                       |                                        |                                                      |                                                                          |                                        |   |
|                                                                                                 |                                                                                                                                                                                                                                                                                                                                                       |                                        |                                                      |                                                                          |                                        |   |
|                                                                                                 |                                                                                                                                                                                                                                                                                                                                                       |                                        |                                                      |                                                                          |                                        |   |

---

and non-farm employment

|                                                                                                                                                                                                                                                                                                                                                         |                                                                                        |                                      |                                                                     |                                        |   |
|---------------------------------------------------------------------------------------------------------------------------------------------------------------------------------------------------------------------------------------------------------------------------------------------------------------------------------------------------------|----------------------------------------------------------------------------------------|--------------------------------------|---------------------------------------------------------------------|----------------------------------------|---|
| 2.4 By 2030, ensure sustainable food production systems and implement resilient agricultural practices that increase productivity and production, that help maintain ecosystems, that strengthen capacity for adaptation to climate change, extreme weather, drought, flooding and other disasters and that progressively improve land and soil quality | 2.4 Proportion of agricultural areas engaged in productive and sustainable agriculture | Arable land per capita               | $x_2 = \frac{\text{Total arable land}}{\text{Total population}}[1]$ | Average of 3 best performers in Hainan | + |
|                                                                                                                                                                                                                                                                                                                                                         |                                                                                        | Fertilizer use for food crops        | Statistics data[1]                                                  | Average of 3 best performers in Hainan | - |
|                                                                                                                                                                                                                                                                                                                                                         |                                                                                        | Amount of pesticides used            | Statistics data[1]                                                  | Average of 3 best performers in Hainan | + |
|                                                                                                                                                                                                                                                                                                                                                         |                                                                                        | Grain sown area                      | Statistics data[1]                                                  | Average of 3 best performers in Hainan | + |
|                                                                                                                                                                                                                                                                                                                                                         |                                                                                        | Squash planting area                 | Statistics data[1]                                                  | Average of 3 best performers in Hainan | + |
|                                                                                                                                                                                                                                                                                                                                                         |                                                                                        | Water field area                     | Statistics data[1]                                                  | Average of 3 best performers in Hainan | - |
|                                                                                                                                                                                                                                                                                                                                                         |                                                                                        | Effective irrigated area of farmland | Statistics data[1]                                                  | Average of 3 best performers in Hainan | + |

---

|                                                                    |                                                                                         |                                                                       |                                                           |                                                                                                                                                                                                                            |                                                                                                         |                           |
|--------------------------------------------------------------------|-----------------------------------------------------------------------------------------|-----------------------------------------------------------------------|-----------------------------------------------------------|----------------------------------------------------------------------------------------------------------------------------------------------------------------------------------------------------------------------------|---------------------------------------------------------------------------------------------------------|---------------------------|
|                                                                    |                                                                                         |                                                                       |                                                           | Based on the reconstructed time series of Normalized Difference Vegetation Index (NDVI) from multiple satellite images including Landsat-8, Sentinel-2 and MODIS,                                                          |                                                                                                         |                           |
|                                                                    |                                                                                         |                                                                       | Cultivated land replanting index                          | 30-m planetary-scale pixel by pixel cropping intensity products were generated by enumerating the total number of valid cropping cycles using a binary crop phenophase profile indicating growing and non-growing periods. | Average of 3 best performers in Hainan                                                                  | +                         |
| 3. Ensure healthy lives and promote well-being for all at all ages | 3.6 By 2020, halve the number of global deaths and injuries from road traffic accidents | 3.6 Deaths due to road traffic injuries as a percentage of population | <div> Traffic deaths </div> <div> Total population </div> | $x_3 = \frac{Traffic\ deaths}{Total\ population} [1]$                                                                                                                                                                      | <div> Average of 3 best performers in Hainan </div> <div> Average of 3 best performers in Hainan </div> | <div>-</div> <div>+</div> |
|                                                                    | 3.8 Achieve universal health                                                            | 3.8 Participation                                                     | Number of                                                 | Statistics data[1]                                                                                                                                                                                                         | Average of 3 best                                                                                       | +                         |

|                                                                                                                                                                                                                                                                                                                                               |                                                                                                                 |                                                           |                                                                                                                            |                                        |   |
|-----------------------------------------------------------------------------------------------------------------------------------------------------------------------------------------------------------------------------------------------------------------------------------------------------------------------------------------------|-----------------------------------------------------------------------------------------------------------------|-----------------------------------------------------------|----------------------------------------------------------------------------------------------------------------------------|----------------------------------------|---|
| coverage, including financial risk protection, access to quality essential health-care services and access to safe, effective, quality and affordable essential medicines and vaccines for all                                                                                                                                                | rate of urban workers' basic medical insurance                                                                  | participants in basic medical care insurance              |                                                                                                                            | performers in Hainan                   |   |
| 3.b Support the research and development of vaccines and medicines for the communicable and non-communicable diseases that primarily affect developing countries, provide access to affordable essential medicines and vaccines, in accordance with the Doha Declaration on the TRIPS Agreement and Public Health, which affirms the right of | 3.b Health and hygiene expenditure as a percentage of general public budget expenditure of the local government | General public budget expenditure of the local government | $x_4 = \frac{\text{Health and hygiene expenditure}}{\text{General public budget expenditure of the local government}} [1]$ | Average of 3 best performers in Hainan | + |
|                                                                                                                                                                                                                                                                                                                                               |                                                                                                                 | Health and hygiene expenditure                            |                                                                                                                            | Average of 3 best performers in Hainan | + |

developing countries to use to the  
 full the provisions in the  
 Agreement on Trade-Related  
 Aspects of Intellectual Property  
 Rights regarding flexibilities to  
 protect public health, and, in  
 particular, provide access to  
 medicines for all

|                                                                                                                                                                                                                                                    |                                                                            |                                                                   |                    |                                           |   |
|----------------------------------------------------------------------------------------------------------------------------------------------------------------------------------------------------------------------------------------------------|----------------------------------------------------------------------------|-------------------------------------------------------------------|--------------------|-------------------------------------------|---|
| 3.c Substantially increase health<br>financing and the recruitment,<br>development, training and<br>retention of the health workforce<br>in developing countries, especially<br>in least developed countries and<br>small island developing States | 3.c Number of<br>licensed<br>(assistant)doctors<br>per 1,000<br>population | Number of<br>licensed doctors<br>per 1,000<br>population          | Statistics data[1] | Average of 3 best<br>performers in Hainan | + |
|                                                                                                                                                                                                                                                    |                                                                            | Number of<br>licensedassistant<br>doctors per 1,000<br>population |                    | Average of 3 best<br>performers in Hainan | + |

|                                                                                                         |                                                                                                                                                                                                                                                                              |                                                                                 |                                                                  |                    |                                        |   |
|---------------------------------------------------------------------------------------------------------|------------------------------------------------------------------------------------------------------------------------------------------------------------------------------------------------------------------------------------------------------------------------------|---------------------------------------------------------------------------------|------------------------------------------------------------------|--------------------|----------------------------------------|---|
| 4. Ensure inclusive and equitable quality education and promote lifelong learning opportunities for all | 4.1 By 2030, ensure that all girls and boys complete free, equitable and quality primary and secondary education leading to relevant and effective learning outcomes                                                                                                         | 4.1 Number of primary and secondary school students in school per 10,000 people | Number of elementary school students in school per 10,000 people | Statistics data[1] | Sustainable Development Report         | + |
|                                                                                                         |                                                                                                                                                                                                                                                                              |                                                                                 | Number of secondary school students in school per 10,000 people  |                    | Average of 3 best performers in Hainan | + |
|                                                                                                         | 4.b By 2020, substantially expand globally the number of scholarships available to developing countries, in particular least developed countries, small island developing States and African countries, for enrolment in higher education, including vocational training and | 4.b Scholarship ODA amounts by sector and type of study                         | Education expenditure as a percentage of GDP                     |                    | Sustainable Development Report         | + |
|                                                                                                         |                                                                                                                                                                                                                                                                              |                                                                                 | Education expenditure per capita                                 |                    | Average of 3 best performers in Hainan | - |

|                  |                                                                                                                                                    |                    |                    |                    |                      |   |
|------------------|----------------------------------------------------------------------------------------------------------------------------------------------------|--------------------|--------------------|--------------------|----------------------|---|
|                  | information and communications technology, technical, engineering and scientific programmes, in developed countries and other developing countries |                    |                    |                    |                      |   |
|                  |                                                                                                                                                    | 6.1 Proportion of  | Coverage rate of   |                    |                      |   |
|                  | 6.1 By 2030, achieve universal and                                                                                                                 | the population     | urban population   |                    | Average of 3 best    |   |
| 6. Ensure        | equitable access to safe and                                                                                                                       | using a safely     | with access to tap | Statistics data[1] | performers in Hainan | + |
| availability and | affordable drinking water for all                                                                                                                  | managed drinking   | water              |                    |                      |   |
| sustainable      |                                                                                                                                                    | water service      |                    |                    |                      |   |
| management of    | 6.2 By 2030, achieve access to                                                                                                                     |                    |                    |                    |                      |   |
| water and        | adequate and equitable sanitation                                                                                                                  |                    |                    |                    |                      |   |
| sanitation for   | and hygiene for all and end open                                                                                                                   | 6.2 Number of      | Number of public   |                    | Average of 3 best    |   |
| all              | defecation, paying special                                                                                                                         | public toilets per | toilets            | Statistics data[1] | performers in Hainan | + |
|                  | attention to the needs of women                                                                                                                    | 10,000 people      |                    |                    |                      |   |
|                  | and girls and those in vulnerable                                                                                                                  |                    |                    |                    |                      |   |
|                  | situations                                                                                                                                         |                    |                    |                    |                      |   |

|                                                                                 |                                                                                                                                                                                                                                                             |                                                              |                                                      |                    |                                        |   |
|---------------------------------------------------------------------------------|-------------------------------------------------------------------------------------------------------------------------------------------------------------------------------------------------------------------------------------------------------------|--------------------------------------------------------------|------------------------------------------------------|--------------------|----------------------------------------|---|
|                                                                                 |                                                                                                                                                                                                                                                             | 7.1 Proportion of                                            |                                                      |                    |                                        |   |
|                                                                                 | 7.1 By 2030, ensure universal access to affordable, reliable and modern energy services                                                                                                                                                                     | population relying primarily on clean fuels and technologies | Coverage rate of urban population with access to gas | Statistics data[1] | Average of 3 best performers in Hainan | - |
| 7. Ensure access to affordable, reliable, sustainable and modern energy for all | 7.3 By 2030, double the global rate of improvement in energy efficiency                                                                                                                                                                                     | 7.3 Energy consumption per unit of GDP by region             | Energy consumption per unit of GDP by region         | Statistics data[1] | Average of 3 best performers in Hainan | + |
|                                                                                 | 7.a By 2030, enhance international cooperation to facilitate access to clean energy research and technology, including renewable energy, energy efficiency and advanced and cleaner fossil-fuel technology, and promote investment in energy infrastructure | 7.a Environment protection expenditure                       | Environment protection expenditure                   | Statistics data[1] | Average of 3 best performers in Hainan | + |

|                                                                                                                         |                                                                                                                                                                                                   |                                 |                                              |                                                                                                                |                                        |   |
|-------------------------------------------------------------------------------------------------------------------------|---------------------------------------------------------------------------------------------------------------------------------------------------------------------------------------------------|---------------------------------|----------------------------------------------|----------------------------------------------------------------------------------------------------------------|----------------------------------------|---|
| and clean energy technology                                                                                             |                                                                                                                                                                                                   |                                 |                                              |                                                                                                                |                                        |   |
|                                                                                                                         |                                                                                                                                                                                                   |                                 |                                              |                                                                                                                |                                        |   |
| 8. Promote sustained, inclusive and sustainable economic growth, full and productive employment and decent work for all | 8.1 Sustain per capita economic growth in accordance with national circumstances and, in particular, at least 7 per cent gross domestic product growth per annum in the least developed countries | 8.1 Per capita GDP              | Per capita GDP                               | Statistics data[1]                                                                                             | Average of 3 best performers in Hainan | + |
|                                                                                                                         | 8.5 By 2030, achieve full and productive employment and decent work for all women and men, including for young people and persons with disabilities, and equal                                    | 8.5 Unemployment rate by region | Contributors of staff and worker at year-end | $x_7 = \frac{\text{Contributors of staff and worker at year-end}}{\text{Number of workforce personnel}}^{[1]}$ | Average of 3 best performers in Hainan | + |
|                                                                                                                         |                                                                                                                                                                                                   |                                 | Number of                                    |                                                                                                                | Average of 3 best performers in Hainan | - |
|                                                                                                                         |                                                                                                                                                                                                   |                                 | workforce                                    |                                                                                                                |                                        |   |

|                   |                                     |                     |                    |                                                                            |                      |   |
|-------------------|-------------------------------------|---------------------|--------------------|----------------------------------------------------------------------------|----------------------|---|
|                   | pay for work of equal value         |                     | personnel          |                                                                            |                      |   |
|                   | 8.9 By 2030, devise and             |                     |                    |                                                                            |                      |   |
|                   | implement policies to promote       | 8.9 The reception   | Reception of       | Statistics data[1]                                                         | Average of 3 best    | - |
|                   | sustainable tourism that creates    | of overnight        | overnight visitors |                                                                            | performers in Hainan |   |
|                   | jobs and promotes local culture     | tourists by region  |                    |                                                                            |                      |   |
|                   | and products                        |                     |                    |                                                                            |                      |   |
|                   | 9.2 Promote inclusive and           |                     | Manufacturing      |                                                                            | Average of 3 best    | + |
| 9. Build          | sustainable industrialization and,  |                     | employment         |                                                                            | performers in Hainan |   |
| resilient         | by 2030, significantly raise        | 9.2 Manufacturing   |                    |                                                                            |                      |   |
| infrastructure,   | industry's share of employment      | employment as a     |                    | $x_8 = \frac{\text{Manufacturing employment}}{\text{Total employment}}[1]$ | Average of 3 best    | + |
| promote           | and gross domestic product, in line | share of total      | Total employment   |                                                                            | performers in Hainan |   |
| inclusive and     | with national circumstances, and    | employment          |                    |                                                                            |                      |   |
| sustainable       | double its share in least developed |                     |                    |                                                                            |                      |   |
| industrialization | countries                           |                     |                    |                                                                            |                      |   |
| and foster        | 9.5 Facilitate sustainable and      | 9.5.1 Proportion of | Proportion of      |                                                                            | Average of 3 best    |   |
| innovation        | resilient infrastructure            | output value of     | output value of    | Statistics data[1]                                                         | performers in Hainan | + |
|                   | development in developing           | secondary and       | secondary and      |                                                                            |                      |   |

|                                                  |                                                                                                                                                                                               |                                                                                                                     |                                                       |                    |                                        |   |
|--------------------------------------------------|-----------------------------------------------------------------------------------------------------------------------------------------------------------------------------------------------|---------------------------------------------------------------------------------------------------------------------|-------------------------------------------------------|--------------------|----------------------------------------|---|
|                                                  | countries through enhanced financial, technological and technical support to African countries, least developed countries, landlocked developing countries and small island developing States | tertiary industries                                                                                                 | tertiary industries                                   |                    |                                        |   |
|                                                  |                                                                                                                                                                                               | 9.5 Science and technology expenditure as a percentage of general public budget expenditure of the local government | Science and technology expenditure                    | Statistics data[1] | Sustainable Development Report         | - |
| 10. Reduce inequality within and among countries | 10.2 By 2030, empower and promote the social, economic and political inclusion of all, irrespective of age, sex, disability, race, ethnicity, origin, religion or economic or other status    | 10.2 Ratio of urban and rural per capita disposable income                                                          | Ratio of urban and rural per capita disposable income | Statistics data[1] | Average of 3 best performers in Hainan | - |
| 11. Make cities                                  | 11.1 By 2030, ensure access for all                                                                                                                                                           | 11.1 Percentage of                                                                                                  | Rural population                                      | Statistics data[1] | Average of 3 best                      | + |

|                                                                  |                                                                                                                                                                                                                                                                            |                                                                                                                           |                                         |                    |                                        |   |
|------------------------------------------------------------------|----------------------------------------------------------------------------------------------------------------------------------------------------------------------------------------------------------------------------------------------------------------------------|---------------------------------------------------------------------------------------------------------------------------|-----------------------------------------|--------------------|----------------------------------------|---|
| and human settlements inclusive, safe, resilient and sustainable | to adequate, safe and affordable housing and basic services and upgrade slums                                                                                                                                                                                              | rural population                                                                                                          |                                         |                    | performers in Hainan                   |   |
|                                                                  |                                                                                                                                                                                                                                                                            | 11.1 Affairs of housing security expenditure as a percentage of general public budget expenditure of the local government | Affairs of housing security expenditure | Statistics data[1] | Average of 3 best performers in Hainan | + |
|                                                                  | 11.2 By 2030, provide access to safe, affordable, accessible and sustainable transport systems for all, improving road safety, notably by expanding public transport, with special attention to the needs of those in vulnerable situations, women, children, persons with | 11.2 Proportion of population with easy access to public transport, disaggregated by age, sex and disability              | Per capita area of paved roads          | Statistics data[1] | Average of 3 best performers in Hainan | + |

|                                                                                                                                                                           |                                                  |                                                                                                     |                                                                                                |                                        |                  |
|---------------------------------------------------------------------------------------------------------------------------------------------------------------------------|--------------------------------------------------|-----------------------------------------------------------------------------------------------------|------------------------------------------------------------------------------------------------|----------------------------------------|------------------|
| disabilities and older persons                                                                                                                                            |                                                  |                                                                                                     |                                                                                                |                                        |                  |
| 11.6 By 2030, reduce the adverse per capita environmental impact of cities, including by paying special attention to air quality and municipal and other waste management | 11.6 Urban fine particulate matter concentration | PM2.5                                                                                               | Remote sensing data used to calculate the local average PM2.5 concentration/statistics data[1] | Justification for Optimum              | Effect Direction |
|                                                                                                                                                                           |                                                  | PM10                                                                                                |                                                                                                | Average of 3 best performers in Hainan | +                |
|                                                                                                                                                                           |                                                  | Proportion of days of air quality equal to or above grade ii in the annal effective monitoring days | Statistics data[1]                                                                             | Average of 3 best performers in Hainan | +                |
|                                                                                                                                                                           |                                                  |                                                                                                     |                                                                                                |                                        |                  |
|                                                                                                                                                                           |                                                  |                                                                                                     |                                                                                                |                                        |                  |
| 11.7 By 2030, provide universal access to safe, inclusive and accessible, green and public spaces, in particular for women and children, older persons and                | 11.7 Proportion of public space area             | Green covered area as % of completed area                                                           | Statistics data[1]                                                                             | Average of 3 best performers in Hainan | +                |
|                                                                                                                                                                           |                                                  | Per capita areas of parks and green                                                                 | Statistics data[1]                                                                             | Average of 3 best performers in Hainan | +                |

---

persons with disabilities

land

---

1. The People's Government of Hainan Province Statistical Yearbook. <https://www.hainan.gov.cn/hainan/zfsj/xsj.Shtml>
